# Supplementary material for: Reproductive and Oncologic Outcomes in Young Women with Stage IA and Grade 2 Endometrial Carcinoma Undergoing Fertility-Sparing Treatment: A Systematic Review
Source: MDPI journal article supplement (doi:10.3390/biom14030306), 2024-03-05
Supplement: s1 [file s1]

| Author                       | Study design and sample representativeness | Sampling technique | Description of the fertility-sparing treatment | Quality of population description | Incomplete outcome data | Total score | Risk of bias |
|------------------------------|--------------------------------------------|--------------------|------------------------------------------------|-----------------------------------|-------------------------|-------------|--------------|
| Andress et al. [28]          | -                                          | -                  | ★                                              | ★                                 | ★                       | ★★★         | Low          |
| Brown et al. [29]            | -                                          | -                  | ★                                              | ★                                 | ★                       | ★★★         | Low          |
| Chae et al. [23]             | -                                          | -                  | ★                                              | ★                                 | ★                       | ★★★         | Low          |
| Falcone et al. [30]          | -                                          | -                  | ★                                              | ★                                 | ★                       | ★★★★        | Low          |
| Gotlieb et al. [31]          | -                                          | -                  | ★                                              | -                                 | ★                       | ★★          | High         |
| He et al. [32]               | -                                          | -                  | ★                                              | ★                                 | ★                       | ★★★★        | Low          |
| Hwang et al. [33]            | -                                          | -                  | ★                                              | ★                                 | ★                       | ★★★         | Low          |
| Imai et al. [34]             | -                                          | -                  | ★                                              | -                                 | ★                       | ★★          | High         |
| Kaku et al. [35]             | -                                          | -                  | ★                                              | ★                                 | ★                       | ★★★         | Low          |
| Kim et al. [36]              | -                                          | -                  | ★                                              | ★                                 | ★                       | ★★★         | Low          |
| Koskas et al. [37]           | -                                          | -                  | -                                              | ★                                 | -                       | ★           | High         |
| Laurelli et al. [38]         | -                                          | -                  | ★                                              | ★                                 | ★                       | ★★★         | Low          |
| Lee et al. [39]              | -                                          | -                  | ★                                              | -                                 | ★                       | ★★★         | High         |
| Newton et al. [40]           | -                                          | -                  | ★                                              | ★                                 | ★                       | ★★★         | Low          |
| Pal et al. [41]              | -                                          | -                  | ★                                              | ★                                 | -                       | ★★          | High         |
| Park et al. [42]             | -                                          | -                  | ★                                              | -                                 | ★                       | ★★★         | High         |
| Roberti Maggiore et al. [43] | -                                          | -                  | ★                                              | ★                                 | ★                       | ★★★         | Low          |
| Rossetti et al. [44]         | -                                          | -                  | ★                                              | ★                                 | -                       | ★★          | High         |
| Sardi et al. [45]            | -                                          | -                  | -                                              | -                                 | ★                       | ★           | High         |
| Shan et al. [46]             | -                                          | -                  | ★                                              | ★                                 | ★                       | ★★★         | Low          |
| Yu et al. [47]               | -                                          | -                  | ★                                              | ★                                 | ★                       | ★★★         | Low          |
| Zuckerman et al. [48]        | -                                          | -                  | ★                                              | -                                 | ★                       | ★★          | High         |

**Table S2.** Risk of bias assessment.
