# Supplementary material for: Reproductive and Oncologic Outcomes in Young Women with Stage IA and Grade 2 Endometrial Carcinoma Undergoing Fertility-Sparing Treatment: A Systematic Review
Source: MDPI journal article supplement (doi:10.3390/biom14030306), 2024-03-05
Supplement: s1 [file s1]

|                                                                                                                                                                                                                                                                                                                                                                                                                                                |
|------------------------------------------------------------------------------------------------------------------------------------------------------------------------------------------------------------------------------------------------------------------------------------------------------------------------------------------------------------------------------------------------------------------------------------------------|
| <p><b>(1) Study design and sample representativeness:</b><br/> 1 point: Study design involved a control group, sample size was greater than or equal to 100 participants and exclusion rate was lower than 20%.<br/> 0 points: Uncontrolled study, sample size less than 100 participants or exclusion rate higher than 20%.</p>                                                                                                               |
| <p><b>(2) Sampling technique:</b><br/> 1 point: Patients recruited consecutively or randomly (randomization criteria clarified).<br/> 0 points: Potential convenience sampling or unspecified sampling technique.</p>                                                                                                                                                                                                                          |
| <p><b>(3) Description of the fertility sparing treatment:</b><br/> 1 point: The authors provided a comprehensive description of the adopted treatment.<br/> 0 points: The study did not report adequate information on the adopted treatment.</p>                                                                                                                                                                                              |
| <p><b>(4) Quality of population description:</b><br/> 1 point: The study reported a clear description of the population (e.g. age, BMI, parity, characteristics of endometrial neoplasm, etc.) with proper measures of dispersion (e.g., mean, standard deviation).<br/> 0 points: The study did not report a clear description of the population, incompletely reported descriptive statistics, or did not report measures of dispersion.</p> |
| <p><b>(5) Incomplete outcome data:</b><br/> 1 point: The study reported complete data about oncological and reproductive outcomes.<br/> 0 points: Selective data reporting cannot be excluded.</p>                                                                                                                                                                                                                                             |

**Table S1.** Modified Newcastle-Ottawa scoring items.

The individual components listed above are summed to generate a total modified Newcastle-Ottawa risk of bias score for each study. Total scores range from 0 to 5.

For the total score grouping, studies were judged to be of low risk of bias ( $\geq 3$  points) or high risk of bias ( $< 3$  points).
